# Supplementary material
Source: Research Square preprint supplement (doi:10.21203/rs.3.rs-8585156/v1)
Supplement: Supplementary file 1 [file 61eff46a032e0e57048d5e34.xlsx]

## Sheet: raw data - graphs
RAT	GROUP	Food Intake (g/d)		Initial body weight (g)		Final body weight (g)		Δ Body weight (g)		Liver (%)		Caecum (%)		Kidneys (%)		Gastrocnemius (%)		Soleus (%)		Spleen (%)		BAT (%)		MWAT (%)		IWAT (%)		RWAT (%)		Adiposity Index (%)		Fat mass (%)		Δ Fat mass (%)		Lean mass (%)		Δ Lean mass (%)		Lean to fat mass ratio		TG (mmol/L)		MCP-1 (ng/mL)		TC (mmol/L)		HDL-c (mmol/L)
		25 weeks	35 weeks	25 weeks	35 weeks	25 weeks	35 weeks	25 weeks	35 weeks	25 weeks	35 weeks	25 weeks	35 weeks	25 weeks	35 weeks	25 weeks	35 weeks	25 weeks	35 weeks	25 weeks	35 weeks	25 weeks	35 weeks	25 weeks	35 weeks	25 weeks	35 weeks	25 weeks	35 weeks	25 weeks	35 weeks	25 weeks	35 weeks	25 weeks	35 weeks	25 weeks	35 weeks	25 weeks	35 weeks	25 weeks	35 weeks	25 weeks	35 weeks	25 weeks	35 weeks	25 weeks	35 weeks	25 weeks	35 weeks
SH_1	SH	14.1729	8.4625	226.13	363.69	279.64	397.86	24.11	34.17	2.78191	2.9746	0.80641	1.41906	0.580513	0.627444	0.740768	0.651785	0.0407056	0.055416	0.26587	0.239014	0.0935128	0.121967	1.05908	1.11997	0.808977	1.06585	1.39895	0.794469	3.26701	2.98	6.44996	5.74	0.757216	0.387775	86.2561	90.08	-0.23338	-0.251325	13.3731	15.68	0.870746	1.36171	5028.27	2596.44	3.6001	3.3411	2.3051	2.6677
SH_2	SH	14.1729	8.4625	228.02	344.5	243.25	363	9.08	18.5	2.35873	2.76464	0.925649	1.42286	0.516555	0.564752	0.705294	0.671453	0.0439798	0.0605293	0.229442	0.277027	0.10663	0.103041	0.878765	1.38457	0.661356	1.34966	0.663414	0.742399	2.20354	3.477	3.10791	7.47	-1.11694	1.35787	89.8664	88.12	2.9324	-0.869349	28.9153	11.79	0.299289	1.96259	7473	3298.32	2.05678	2.7195		1.813
SH_3	SH	13.9821		229.12	341.93	253.13	363.98	10.37	22.05	2.72508		0.922836	1.54466	0.563754	0.690089		0.470223		0.0416795	0.211508	0.262665	0.181752	0.125038	0.793357	1.11444	0.624874	1.10269	0.806627	0.948558	2.22486	3.166	3.07879	6.82	-0.949883	0.749588	89.1097	88.15	1.47168	-0.837256	28.9431	12.93	0.580174	1.03476	6171.38	6989.72	2.10082	5.5685		4.1958
SH_4	SH	13.9821		229.44	347.8	254.42	367.05	11.14	19.25	2.61434	2.83726	0.601392	1.40168	0.534213	0.618437	0.796492	0.575169	0.0502836	0.0507097	0.210387	0.210555	0.146024	0.14083	0.901082	1.40609	0.613058	1.5246	0.697936	1.2705	2.21208	4.201	3.2977	11.33	-0.183888	0.578734	88.5413	84.53	-0.904375	-0.937641	26.8494	7.46	0.667346	1.10545	6059.35	4647.32	2.32103	4.1699	1.739	3.108
SH_5	SH	12.6736	8.34286	234.58	325.34	277.6	358.79	36.47	33.45	2.74698	2.59466	1.36479	1.45646	0.561504	0.572753	0.773771	0.733427	0.0442696	0.0553371	0.178213	0.220787	0.124106	0.0848315	1.03409	1.37781	0.660638	1.52472	1.31938	0.910674	3.01411	3.813	5.96902	6.52	0.34688	2.53161		89.12	-4.05821	-3.39049		13.67	0.415517	1.91841	5121.48	9106.16	2.43418	4.3771	1.4504	3.1857
SH_6	SH	12.6736	8.34286	236.41	301.57	251.8	346.29	13.42	44.72	2.61074	2.8292	1.12406	1.38404	0.535586	0.595666	0.757455	0.655613	0.038171	0.0508817	0.24334	0.219025	0.117296	0.0918209	0.965408	1.48171	0.408748	1.58376	0.972962	0.865573	2.34712	3.931	4.92719	6.88	-1.47855	0.924376	88.0209	88.68	1.07011		17.8643	12.89	0.570489	0.902209	8101.22	2634.24	2.43612	4.8174	1.554	3.7814
SH_7	SH	13.3864	8.7125	236.68	324.85	262.41	329.8	31.77	4.95	2.82966	2.59842	1.72277		0.478591	0.545432	0.719438	0.647117	0.0407229	0.0643697	0.233866	0.233223	0.0950202	0.111014	0.72448	0.848622	0.4592	1.27993	0.603863	0.801045	1.78754	2.93	3.44499	6.34	1.18172	0.131264	89.1658	89.28	-1.02381	-0.885346	25.8827	14.09	0.45426	1.32636	6032.88	3491.12	2.07896	3.0821	1.4245	2.2533
SH_8	SH	13.3864	8.7125	239.62	390.07	275.67	377.66	30.92	-12.41	2.88108	2.52744	0.977906	1.2105	0.538256	0.615177	0.70952	0.593669	0.044484	0.0595599	0.240214	0.253681	0.104537	0.116638	1.17475	1.47769	0.497479	1.41565	1.23925	1.19147	2.91148	4.085	5.39171	10.26	0.538375	-1.26228	87.5431	85.14	0.202063	0.292881	16.2366	8.3	0.367089	1.29985	5690.12	4704.4	2.77801	3.1857	1.9425	2.3828
SH_9	SH	13.5579	8.61964	250.31	325.13	271.34	347.1	8.13	21.97	2.57575	2.67767	1.46155	1.4847	0.501227	0.540049		0.638267	0.0436009	0.0495485	0.198952	0.235722	0.100392	0.125191	0.652915	1.96523	0.81193	1.77554	0.777855	1.2437	2.2427	4.984	5.55269	10.99	-1.03647	2.30087	87.3824	89.26	1.28762	1.56439	15.7369	8.12	0.31866	1.51193	6968.62	2782.32	2.5025	2.6936	1.6317	1.9943
SH_10	SH	13.5579	8.61964	253.66	317.65	269.04	331.52	9.86	13.87	2.51581	2.5362	0.850596	1.47674	0.556334	0.595464	0.747207	0.593324	0.0469608	0.0531882	0.23291	0.227426	0.0882409	0.111267	0.851733	1.58617	0.741526	2.21557	0.556334	1.20621	2.14959	5.008	4.30171	10.21	-0.728252	2.2124	88.6622	85.12	0.848025	-2.42192	20.6109	8.34	0.279917	1.28218	7384.48	3025.28	2.69093	3.3411	1.8648	2.5123
OVX_11	OVX	17.0093	11.5429	302.71	443.66	365.42	551.24	45.17	107.58		2.20752	0.739411	0.973531	0.448247	0.414335	0.707714	0.541894	0.0401122	0.0333162	0.234502	0.221985	0.0625526	0.0935061	0.99439	1.67078	0.955961	1.92645	1.04497	1.0709	2.99532	4.668	8.54177	13.75	2.37154	4.94122	85.3018	81.01	-1.60694	-5.78415	9.98644	5.89	0.405831	0.955228	9677.12	8680.4	4.04969	4.4807	1.98279	3.7814
OVX_12	OVX	17.0093	11.5429	249.44	426.67	288.69	503.43	28.92	76.76	2.3807	2.20104	1.31327	1.23408	0.514641	0.414527	0.65063	0.586808	0.0406203	0.0469123	0.213698	0.18037	0.098195	0.0849274	0.924022	2.32054	0.885168	2.07829	1.09186	1.88236	2.90105	6.281	8.97156	16.22	1.86784	9.29543	84.0994	78.95	-0.46383	-9.05514	9.374	4.87	0.163689	1.14963	7707.68	5548.16	2.90107	4.0922	2.0461	2.331
OVX_13	OVX	15.7	11.2768	291.93	409.74	352.07	488.61	46.49	78.87	2.39539	2.04413	0.836034	1.05993	0.459045	0.396921	0.696744	0.576765	0.0502263	0.0481689	0.191269	0.243159	0.0975325	0.124945	1.29712	1.86071	0.663455	2.59986	1.70127	1.887	3.66185	6.348	8.70755	18.82	3.55451	10.0317	84.1452	77.42	-2.97765	-9.61771	9.66348	4.11	0.580174	0.955228	9783.95	8023.28	3.13354	4.1699	2.2533	2.5123
OVX_14	OVX	15.7	11.2768	292.94	415.45	364.36	495.15	56.91	79.7	2.30759	2.22879	0.977118	1.57988	0.47067	0.434261	0.695604	0.564126		0.0380495	0.193316	0.199347	0.075995	0.101328	0.895299	1.77096	0.814866	2.4848	0.81237	1.66115	2.52254	5.917	6.21912	15.93	3.6084	8.42458	86.5627	79.59	-1.62613	-9.48999	13.9188	5	0.299289	0.999411	9992.27	5545.88	3.1002	3.626	2.3828	2.9267
OVX_15	OVX	13.7671	10.3564	259.69	405.6	306.37	454.51	32.32	48.91	2.25274	2.26104	0.943253	2.00004	0.469321	0.404281	0.741692	0.5627	0.0424859	0.0438323	0.210454	0.227172	0.0981458	0.0896671	1.11583	1.70991	1.12176	2.43859	0.515759	1.12451	2.75335	5.273	8.3385	12.6	2.41987	5.45594	84.9213	83.56	-2.24651	-6.07779	10.1842	6.63	0.347717	1.1408	10837.1	4183.76	2.5954	3.8332	1.8389	3.0562
OVX_16	OVX	13.7671	10.3564	260.65	402.52	302.78	449.28	35.18	46.76	2.13334	2.22954	1.00203	1.54342	0.440028	0.473834	0.773705	0.615734	0.0451992	0.0404132	0.224999	0.202974	0.0897338	0.0710637	0.802619	2.05449	1.18449	2.57963	0.561002	1.49211	2.54811	6.126	5.21391	15.01	2.37883	6.89829	87.8592	81.01	-2.63036	-6.0838	16.8509	5.4	0.31866	0.893373	6824.55	7098.48	2.54911	4.5066	1.6317	3.6519
OVX_17	OVX	16.97	9.9975	281.07	401.22	328.9	452.49	26.79	51.27	2.37754	2.17396	1.21305	1.23882	0.428225	0.456419	0.71047	0.575165	0.0382398	0.0425781	0.193627	0.212891	0.0834598	0.0707382	1.02731	1.84167	1.14841	3.55088	1.03733	2.73108	3.21305	8.124	8.99159	21.44	3.52007	10.0236	83.9941	75.41	-2.65533	-9.04357	9.34141	3.52		1.06127	6735.75	5113.16	2.92891	4.0663	1.9684	3.2634
OVX_18	OVX	16.97	9.9975	280.88	411.73	335.15	441.22	31.99	29.49	2.32189	2.43374	0.904701	1.41734	0.441686	0.399091	0.688746	0.493704	0.0429541		0.205291	0.222155	0.10546	0.0976277	1.05697	1.91684	1.06052	2.6756	0.895518	1.63671	3.013	6.229	9.70809	17.2	4.27202	9.08436	84.7362	77.92	-2.65441	-8.624	8.72841	4.53	0.570489		6116.68	4706.72	3.0549	3.7814	1.9943	2.9008
OVX_19	OVX	14	9.28321	272.08	398.45	328.26	433.48	22.67	35.03	2.2384	2.08873	0.973311	1.06453	0.410601	0.424873	0.675314	0.547974	0.0395048	0.0400957	0.209655	0.20892	0.0920742	0.0813637	1.09774	2.20245	1.51985	4.00347	0.853863	1.9743	3.47144	8.18	10.2409	23.87	4.20118	8.18195	82.8256	72.05	-3.80572	-8.9294	8.08775	3.02	0.299289	1.00825	11058.6	5021.4	2.98953	3.4706	1.813	2.6418
OVX_20	OVX	14	9.28321	272.15	408.7	318.16	447.27	24.8	38.52	2.26681	2.13193	0.968205	1.01963	0.453617	0.424883	0.698142	0.49137	0.0434144	0.042124	0.234949	0.172139	0.0762945	0.0655768	1.10004	2.5411	1.30179	3.40134	0.750495	2.57252	3.15233	8.515	11.3601	23.82	4.74026	9.97475	81.1856	72.27	-4.54641	-13.6888	7.14655	3.03	0.686717	1.10545	15000.2	4107.4	2.8198	4.4807	1.9166	3.6778
		Food Intake (g/d)		Initial body weight (g)		Final body weight (g)		Δ Body weight (g)		Liver (%)		Caecum (%)		Kidneys (%)		Gastrocnemius (%)		Soleus (%)		Spleen (%)		BAT (%)		MWAT (%)		IWAT (%)		RWAT (%)		Adiposity Index (%)		Fat mass (%)		Δ Fat mass (%)		Lean mass (%)		Δ Lean mass (%)		Lean to fat mass ratio		TG (mmol/L)		MCP-1 (ng/mL)		TC (mmol/L)		HDL-c (mmol/L)
		25 weeks	35 weeks	25 weeks	35 weeks	25 weeks	35 weeks	25 weeks	35 weeks	25 weeks	35 weeks	25 weeks	35 weeks	25 weeks	35 weeks	25 weeks	35 weeks	25 weeks	35 weeks	25 weeks	35 weeks	25 weeks	35 weeks	25 weeks	35 weeks	25 weeks	35 weeks	25 weeks	35 weeks	25 weeks	35 weeks	25 weeks	35 weeks	25 weeks	35 weeks	25 weeks	35 weeks	25 weeks	35 weeks	25 weeks	35 weeks	25 weeks	35 weeks	25 weeks	35 weeks	25 weeks	35 weeks	25 weeks	35 weeks
AVERAGE	SHAM	13.5546	8.53437	236.397	338.253	263.83	358.305	18.527	20.052	2.66401	2.70445	1.0758	1.4223	0.536653	0.596526	0.743743	0.623005	0.0436865	0.0541219	0.22447	0.237912	0.115751	0.113164	0.903566	1.37623	0.628779	1.4838	0.903658	0.99746	2.436	3.8575	4.55217	8.256	-0.266979	0.99122	88.2831	87.748	0.159213	-0.859561	21.6014	11.327	0.482349	1.37054	6403.08	4327.53	2.49994	3.7296	1.739	2.78943
	OVX	15.4893	10.4914	276.354	412.374	329.016	471.668	35.124	59.289	2.29715	2.20004	0.987038	1.31312	0.453608	0.424342	0.703876	0.555624	0.0425285	0.0417211	0.211176	0.209111	0.0879443	0.0880743	1.03113	1.98894	1.06563	2.77389	0.926443	1.80327	3.0232	6.5661	8.62931	17.866	3.29345	8.23118	84.5631	77.919	-2.52133	-8.63944	10.3282	4.6	0.407984	1.02985	9373.4	5802.86	3.01222	4.05076	1.98279	3.07433
SEM	SHAM	0.174454	0.0537335	2.94824	8.0031	3.99529	6.55749	3.49878	5.07513	0.0502583	0.0518355	0.108377	0.0311257	0.0098335	0.0141086	0.0112863	0.0222657	0.00119839	0.00204814	0.00792976	0.00660613	0.00911089	0.00528052	0.0504355	0.0957979	0.0441559	0.106356	0.0983961	0.0657063	0.147099	0.236244	0.402418	0.685943	0.291388	0.3671	0.367344	0.642789	0.600592	0.477661	2.03814	0.946472	0.0598367	0.109943	327.638	682.098	0.1452	0.303471	0.103996	0.243823
	OVX	0.465022	0.276657	5.31212	4.31378	8.22554	11.7014	3.48339	7.94013	0.028135	0.0336825	0.0528302	0.102527	0.00890805	0.00786399	0.0107477	0.0123587	0.001204	0.00150163	0.0051288	0.00680003	0.00417862	0.00558705	0.0436252	0.0903483	0.0785608	0.210422	0.105749	0.17117	0.116739	0.407735	0.568027	1.26891	0.30868	0.593458	0.58411	1.1911	0.364428	0.736683	0.916539	0.380506	0.0563563	0.0299339	844.08	503.366	0.13105	0.11693	0.0678814	0.161286
t test		Food Intake (g/d)		Initial body weight (g)		Final body weight (g)		Δ Body weight (g)		Liver (%)		Caecum (%)		Kidneys (%)		Gastrocnemius (%)		Soleus (%)		Spleen (%)		BAT (%)		MWAT (%)		IWAT (%)		RWAT (%)		Adiposity Index (%)		Fat mass (%)		Δ Fat mass (%)		Lean mass (%)		Δ Lean mass (%)		Lean to fat mass ratio		TG (mmol/L)		MCP-1 (ng/mL)		TC (mmol/L)		HDL-c (mmol/L)
		25 weeks	35 weeks	25 weeks	35 weeks	25 weeks	35 weeks	25 weeks	35 weeks	25 weeks	35 weeks	25 weeks	35 weeks	25 weeks	35 weeks	25 weeks	35 weeks	25 weeks	35 weeks	25 weeks	35 weeks	25 weeks	35 weeks	25 weeks	35 weeks	25 weeks	35 weeks	25 weeks	35 weeks	25 weeks	35 weeks	25 weeks	35 weeks	25 weeks	35 weeks	25 weeks	35 weeks	25 weeks	35 weeks	25 weeks	35 weeks	25 weeks	35 weeks	25 weeks	35 weeks	25 weeks	35 weeks	25 weeks	35 weeks
SHAM	OVX	0.00106028	1.23715e-05	3.53495e-06	1.87043e-07	1.21629e-06	1.11183e-07	0.00347419	0.000583391	1.02009e-05	2.11043e-07	0.471118	0.344638	6.66145e-06	3.31043e-09	0.0218756	0.016429	0.505227	0.000170701	0.176249	0.00707604	0.0125091	0.00431379	0.0717912	0.000197826	0.00012931	3.38362e-05	0.876416	0.000349349	0.00582635	1.89627e-05	1.51283e-05	2.98821e-06	1.24125e-07	5.05252e-09	6.51061e-05	9.45184e-07	0.00126639	1.25764e-07	6.84677e-05	3.41405e-06	0.381173	0.0111213	0.00415605	0.0988662	0.0173882	0.336478	0.0587449	0.342699
[truncated: 87 more columns]
