# Supplementary material
Source: Research Square preprint supplement (doi:10.21203/rs.3.rs-8585156/v1)
Supplement: Supplementary file 2 [file 8c2999733d96caa6325b8392.xlsx]

## Sheet: Deseq2
gene_names	baseMean	log2FoldChange	Fold-change	lfcSE	stat	pvalue	padj	log_padj	log_pvalue
AABR07027872.1	564.668	-0.583525	-1.49851	0.10617	-5.49613	3.88225e-08	0.000151809	3.8187	7.41092
Il18r1	497.976	-0.861419	-1.81682	0.152183	-5.66041	1.51014e-08	0.000151809	3.8187	7.82098
Tubb2b	124.755	-1.17123	-2.25204	0.21162	-5.53462	3.11903e-08	0.000151809	3.8187	7.50598
Bpifb4	41.8726	-1.26182	-2.39798	0.236315	-5.33955	9.31761e-08	0.000273262	3.56342	7.0307
Btbd11	346.571	1.51232	2.85268	0.287782	5.25509	1.47953e-07	0.000347127	3.45951	6.82988
Tra2a	2088.42	0.4121	1.33062	0.0815763	5.05172	4.37858e-07	0.000856086	3.06748	6.35867
Dhrs9	167.926	-1.12856	-2.18641	0.229625	-4.91481	8.8868e-07	0.0014893	2.82702	6.05125
AABR07031480.1	1847.58	0.403353	1.32258	0.0851646	4.73616	2.17807e-06	0.00319387	2.49568	5.66193
Echdc2	122.439	1.00415	2.00576	0.218543	4.59473	4.333e-06	0.0053392	2.27252	5.36321
Dusp10	1740.23	0.695172	1.61908	0.151636	4.58447	4.55136e-06	0.0053392	2.27252	5.34186
Rgcc	2254.6	0.592399	1.50775	0.133191	4.44776	8.67714e-06	0.00683396	2.16533	5.06162
Gda	2601.62	-0.330103	-1.2571	0.0744194	-4.43571	9.17672e-06	0.00683396	2.16533	5.03731
Tcp11l1	188.806	-0.583127	-1.49809	0.131561	-4.43236	9.32089e-06	0.00683396	2.16533	5.03054
F13a1	18580.6	-0.848872	-1.80109	0.191057	-4.44303	8.86993e-06	0.00683396	2.16533	5.05208
Pf4	24660.9	-0.938236	-1.91618	0.211619	-4.4336	9.26706e-06	0.00683396	2.16533	5.03306
Ermap	425.863	-1.06276	-2.08892	0.236183	-4.49971	6.80462e-06	0.00683396	2.16533	5.1672
Cxcr3	636.985	-0.914453	-1.88485	0.210362	-4.34705	1.37982e-05	0.00952156	2.02129	4.86018
Myb	2299.14	1.00815	2.01133	0.234694	4.2956	1.74223e-05	0.00955699	2.01968	4.75889
Rptor	2854.06	-0.335316	-1.26165	0.0776218	-4.31987	1.56123e-05	0.00955699	2.01968	4.80653
Sh3bp2	1079.44	-0.386586	-1.3073	0.0895171	-4.31857	1.57043e-05	0.00955699	2.01968	4.80398
Bglap	143.895	-0.890332	-1.8536	0.20757	-4.28931	1.79229e-05	0.00955699	2.01968	4.74659
Slc2a4	526.665	-1.6738	-3.19053	0.38904	-4.30238	1.68973e-05	0.00955699	2.01968	4.77218
Hspa5	5177.71	0.417195	1.33533	0.0980365	4.25551	2.08573e-05	0.0106047	1.9745	4.68074
Tab1	677.038	-0.317792	-1.24642	0.0748328	-4.24668	2.16957e-05	0.0106047	1.9745	4.66363
Tob1	1435.17	0.526539	1.44047	0.125313	4.20178	2.6483e-05	0.0119489	1.92267	4.57703
Il12rb1	230.278	-0.470773	-1.38585	0.11196	-4.20482	2.61292e-05	0.0119489	1.92267	4.58287
Pcna	1639.11	0.383373	1.30439	0.0920427	4.16517	3.1112e-05	0.0124079	1.9063	4.50707
Xpo5	4006.22	-0.72588	-1.65391	0.174462	-4.16067	3.17311e-05	0.0124079	1.9063	4.49851
NEWGENE_620180	16366.6	-0.927165	-1.90154	0.222687	-4.16354	3.13357e-05	0.0124079	1.9063	4.50396
Shpk	2077.8	-0.947924	-1.92909	0.226599	-4.18327	2.87345e-05	0.0124079	1.9063	4.5416
Mars2	904.749	0.539516	1.45348	0.131047	4.11695	3.83914e-05	0.0137849	1.8606	4.41577
Dtx3	488.592	0.444221	1.36058	0.108142	4.10775	3.99529e-05	0.0137849	1.8606	4.39845
Mcl1	15332.1	0.24605	1.18596	0.0598129	4.11365	3.89448e-05	0.0137849	1.8606	4.40955
Rps6ka5	2303.61	-0.754704	-1.68729	0.183151	-4.12067	3.77778e-05	0.0137849	1.8606	4.42276
Pmm2	1151.55	-0.258006	-1.19582	0.0633221	-4.0745	4.61134e-05	0.0154559	1.81091	4.33617
Cdadc1	563.576	0.376915	1.29856	0.0936573	4.0244	5.71197e-05	0.0165002	1.78251	4.24321
Pigv	676.389	-0.354358	-1.27842	0.0880091	-4.02638	5.66426e-05	0.0165002	1.78251	4.24686
Cr2	2751.5	-0.438786	-1.35546	0.109092	-4.02215	5.76682e-05	0.0165002	1.78251	4.23906
Dnah1	580.159	-0.848705	-1.80088	0.210906	-4.02409	5.71962e-05	0.0165002	1.78251	4.24263
Id3	993.692	-0.861317	-1.8167	0.213749	-4.02957	5.58786e-05	0.0165002	1.78251	4.25275
Smpdl3b	1858.85	-0.914044	-1.88432	0.226435	-4.03668	5.42138e-05	0.0165002	1.78251	4.26589
Sox4	1628.78	0.889669	1.85275	0.223132	3.98719	6.68618e-05	0.0167316	1.77646	4.17482
Hexim1	3213.64	0.382315	1.30343	0.0955147	4.00268	6.26285e-05	0.0167316	1.77646	4.20323
Oser1	1282.95	0.295065	1.22694	0.0735758	4.01036	6.06275e-05	0.0167316	1.77646	4.21733
Vamp2	2886.3	0.261585	1.19879	0.0655923	3.98804	6.66219e-05	0.0167316	1.77646	4.17638
Pkia	151.84	-0.851394	-1.80424	0.213565	-3.98657	6.70348e-05	0.0167316	1.77646	4.1737
Cish	623.685	-1.05916	-2.08372	0.265362	-3.99139	6.56877e-05	0.0167316	1.77646	4.18252
Mfsd6	5760.54	-0.549543	-1.46362	0.139634	-3.9356	8.29894e-05	0.0200144	1.69866	4.08098
Pla2g2d	309.908	-0.550702	-1.4648	0.139991	-3.93384	8.35995e-05	0.0200144	1.69866	4.0778
Chrne	662.454	0.497119	1.41139	0.126807	3.92029	8.84428e-05	0.0203173	1.69213	4.05334
Rbm17	928.672	0.25755	1.19545	0.0656517	3.92297	8.74631e-05	0.0203173	1.69213	4.05817
Plxnc1	1208.29	-0.609576	-1.52581	0.155666	-3.91592	9.00603e-05	0.0203173	1.69213	4.04547
Vcpkmt	645.888	0.416014	1.33424	0.107024	3.88711	0.000101444	0.0220377	1.65683	3.99378
Tubb4a	95.4814	-1.1171	-2.1691	0.287236	-3.88912	0.00010061	0.0220377	1.65683	3.99736
Gca	368.894	-0.554564	-1.46872	0.143088	-3.87569	0.000106321	0.0222724	1.65223	3.97338
Adgra2	2069.12	-0.933585	-1.91002	0.240693	-3.87873	0.000105003	0.0222724	1.65223	3.9788
Klf6	15504.4	0.494504	1.40884	0.128037	3.8622	0.000112373	0.0228992	1.64018	3.94934
Il18rap	1140.78	-0.577192	-1.49194	0.149517	-3.86037	0.000113217	0.0228992	1.64018	3.94609
Ptp4a1	3245.83	0.434089	1.35106	0.112838	3.84702	0.000119564	0.0233768	1.63121	3.9224
Cald1	1731.48	-0.803195	-1.74496	0.208698	-3.84861	0.000118792	0.0233768	1.63121	3.92521
Ccdc146	146.161	-0.951718	-1.93417	0.248037	-3.837	0.000124547	0.0239518	1.62066	3.90467
Arl5b	875.65	0.531568	1.4455	0.139143	3.82029	0.000133294	0.0250223	1.60167	3.87519
Btg2	36336.9	0.43586	1.35272	0.114151	3.81829	0.00013438	0.0250223	1.60167	3.87167
Fzd8	198.078	-0.61685	-1.53352	0.162373	-3.79896	0.000145306	0.0261492	1.58254	3.83772
Ceacam4	531.257	-0.705472	-1.63068	0.185852	-3.79588	0.000147118	0.0261492	1.58254	3.83233
Atf5	1086.22	-0.865832	-1.82239	0.227935	-3.79859	0.000145519	0.0261492	1.58254	3.83708
Chst2	1090.21	0.923541	1.89677	0.244256	3.78104	0.000156173	0.0273443	1.56313	3.80639
S1pr1	43301.6	0.476885	1.39174	0.127471	3.74111	0.000183206	0.0304646	1.5162	3.73706
Srsf5	11134.9	0.286499	1.21968	0.0765121	3.74449	0.000180758	0.0304646	1.5162	3.7429
Mfap3l	1781.42	-0.765998	-1.70055	0.204338	-3.74868	0.000177767	0.0304646	1.5162	3.75015
Pltp	2127.3	-0.841275	-1.79163	0.22497	-3.73951	0.000184382	0.0304646	1.5162	3.73428
Tgfb3	10.7711	-1.89469	-3.71843	0.511305	-3.7056	0.000210889	0.0304646	1.5162	3.67595
Nip7	510.665	0.37044	1.29275	0.100242	3.69547	0.000219485	0.0354862	1.44994	3.6586
Uqcrb	426.494	0.313248	1.2425	0.0848011	3.69392	0.000220824	0.0354862	1.44994	3.65595
Abhd4	2556.68	-0.544897	-1.45892	0.147987	-3.68206	0.000231355	0.036676	1.43562	3.63572
Gypa	347.583	-2.0652	-4.18493	0.561843	-3.67577	0.000237136	0.0370912	1.43073	3.625
Btg3	236.29	0.684754	1.60743	0.186566	3.67031	0.000242255	0.0373934	1.4272	3.61573
Selenop	2469.71	0.617701	1.53443	0.168526	3.66531	0.00024704	0.0376367	1.42439	3.60723
Cpxm1	45.5387	1.14826	2.21646	0.31374	3.65991	0.000252303	0.0376992	1.42367	3.59808
Uhmk1	4017.5	-0.340472	-1.26617	0.093068	-3.65832	0.000253877	0.0376992	1.42367	3.59538
Rasgef1b	2009.02	0.730558	1.65928	0.200114	3.65071	0.000261515	0.0379486	1.4208	3.5825
Plp1	7783.52	-0.648425	-1.56746	0.17764	-3.65021	0.000262027	0.0379486	1.4208	3.58165
Dnajb4	771.79	0.321738	1.24984	0.088525	3.63443	0.000278597	0.0381405	1.41861	3.55502
Nop58	1828.65	0.317885	1.2465	0.0875593	3.63051	0.000282859	0.0381405	1.41861	3.54843
Ints6	3942.01	0.196298	1.14575	0.0540072	3.63467	0.000278339	0.0381405	1.41861	3.55543
Med12l	1503.25	-0.771241	-1.70674	0.21228	-3.63314	0.000279996	0.0381405	1.41861	3.55285
Hacd4	3168.67	-0.812901	-1.75674	0.223306	-3.6403	0.000272321	0.0381405	1.41861	3.56492
Asb15	85.425	-1.12237	-2.17704	0.308658	-3.63628	0.000276603	0.0381405	1.41861	3.55814
Accs	233.826	-0.450514	-1.36653	0.124197	-3.62743	0.000286262	0.0381606	1.41838	3.54324
Aktip	685.072	-0.368759	-1.29124	0.101763	-3.6237	0.000290417	0.0382796	1.41703	3.53698
Cd28	11552.5	0.334219	1.2607	0.0926086	3.60894	0.000307446	0.0396335	1.40194	3.51223
Spring1	343.868	-0.49118	-1.40559	0.136008	-3.6114	0.000304544	0.0396335	1.40194	3.51635
Dnajb9	1550.42	0.472331	1.38735	0.131233	3.59919	0.000319209	0.0407027	1.39038	3.49592
Smim5	16.8445	-1.8156	-3.52005	0.50488	-3.59609	0.000323031	0.0407027	1.39038	3.49076
Socs3	7051.64	0.727458	1.65572	0.203008	3.5834	0.000339145	0.0420385	1.37635	3.46961
Draxin	769.712	0.321589	1.24971	0.0896644	3.58659	0.000335029	0.0420385	1.37635	3.47492
Pam	1464.12	-0.681073	-1.60333	0.190116	-3.58241	0.000340436	0.0420385	1.37635	3.46796
Plk2	140.895	0.793976	1.73385	0.222229	3.57278	0.000353208	0.0427604	1.36896	3.45197
Kcna3	10025.5	-0.518719	-1.43268	0.145197	-3.57251	0.000353572	0.0427604	1.36896	3.45152
Grb7	39.7802	1.5867	3.00363	0.445498	3.56165	0.000368538	0.0432483	1.36403	3.43352
Pbx1	450.781	0.623181	1.54027	0.174746	3.56621	0.000362177	0.0432483	1.36403	3.44108
1600014C10Rik	1003.01	-0.692579	-1.61617	0.19446	-3.56155	0.000368667	0.0432483	1.36403	3.43337
Rsu1	1730.17	-0.275712	-1.21059	0.0774851	-3.55826	0.000373326	0.0433612	1.3629	3.42791
Zfp282	556.449	-0.309058	-1.2389	0.0871107	-3.54788	0.00038835	0.0446641	1.35004	3.41078
Ccdc86	972.15	0.355846	1.27974	0.100601	3.5372	0.000404393	0.0457879	1.33925	3.3932
Taf9	2263.56	0.307304	1.23739	0.0869346	3.53489	0.000407951	0.0457879	1.33925	3.38939
Fgd4	721.368	-0.578954	-1.49377	0.163955	-3.53116	0.000413734	0.0457879	1.33925	3.38328
Abca1	356.832	-0.661654	-1.5819	0.187274	-3.53308	0.000410748	0.0457879	1.33925	3.38642
Trib2	9045.39	0.431125	1.34828	0.12256	3.51767	0.000435346	0.0472874	1.32525	3.36117
RGD1304884	1626.6	-0.625533	-1.54278	0.177753	-3.51912	0.000432982	0.0472874	1.32525	3.36353
Loxl3	448.499	-0.812715	-1.75651	0.231684	-3.50785	0.000451739	0.0486179	1.3132	3.34511
Traf1	789.612	-0.484227	-1.39884	0.138482	-3.49667	0.00047111	0.0502418	1.29893	3.32688
Cxcl10	110.763	1.39891	2.63702	0.400417	3.49363	0.000476495	0.0503582	1.29793	3.32194
Cacybp	1169.06	0.278717	1.21312	0.0799389	3.48663	0.000489143	0.0512333	1.29045	3.31056
Defb24	13.6354	-1.84971	-3.60427	0.530535	-3.48649	0.000489399	0.0512333	1.29045	3.31034
Ciart	225.617	1.00654	2.00909	0.289308	3.47913	0.000503042	0.051758	1.28602	3.2984
Hnrnph2	2640.64	0.262583	1.19962	0.0755239	3.47683	0.000507389	0.051758	1.28602	3.29466
Mapk1	11285.1	-0.445326	-1.36162	0.127962	-3.48015	0.000501129	0.051758	1.28602	3.30005
Sytl4	704.064	-0.696526	-1.6206	0.200737	-3.46984	0.000520761	0.0526642	1.27848	3.28336
Bex1	34.4861	1.04508	2.06348	0.301615	3.46494	0.00053035	0.052755	1.27774	3.27544
Eif4a2	8341.36	0.264731	1.20141	0.0763839	3.46579	0.000528669	0.052755	1.27774	3.27682
Ints9	1829.99	-0.385422	-1.30624	0.11124	-3.46479	0.000530653	0.052755	1.27774	3.27519
Agrp	94.8787	-1.01707	-2.0238	0.294057	-3.45875	0.000542697	0.0534989	1.27165	3.26544
Areg	3.78251	3.22413	9.34459	0.934294	3.45087	0.000558773	0.0536757	1.27022	3.25276
Stoml1	142.451	-0.521757	-1.4357	0.151056	-3.45407	0.000552187	0.0536757	1.27022	3.25791
Mgrn1	15078.4	-0.681685	-1.60401	0.197397	-3.45336	0.000553641	0.0536757	1.27022	3.25677
Lmbrd1	2565.43	-0.223197	-1.16732	0.064731	-3.44808	0.000564593	0.0542889	1.26529	3.24826
Ptgs2	148.793	1.25279	2.38302	0.363656	3.445	0.000571065	0.0544647	1.26388	3.24331
Ankrd49	681.206	0.388249	1.3088	0.112979	3.43647	0.000589347	0.0557551	1.25372	3.22963
Rhag	1541	-0.813861	-1.75791	0.236996	-3.43406	0.000594602	0.0558022	1.25335	3.22577
Tp53rk	343.751	0.362051	1.28525	0.106357	3.4041	0.000663822	0.0571823	1.24274	3.17795
Eif1	15301.1	0.290384	1.22297	0.0851141	3.41171	0.000645578	0.0571823	1.24274	3.19005
Peli1	3227.27	0.268689	1.20471	0.078733	3.41266	0.000643312	0.0571823	1.24274	3.19158
Cry1	906.739	0.246731	1.18652	0.0721375	3.42029	0.000625547	0.0571823	1.24274	3.20374
Zbtb44	2936.21	0.213311	1.15935	0.0627301	3.40046	0.000672714	0.0571823	1.24274	3.17217
Btla	2991.01	-0.317336	-1.24603	0.0931498	-3.40672	0.000657474	0.0571823	1.24274	3.18212
Bfar	469.911	-0.324446	-1.25218	0.0953583	-3.40239	0.00066799	0.0571823	1.24274	3.17523
Il16	8507.82	-0.34147	-1.26705	0.100357	-3.40254	0.000667622	0.0571823	1.24274	3.17547
Kcnj5	355.056	-0.422682	-1.34042	0.124077	-3.40661	0.000657747	0.0571823	1.24274	3.18194
Aig1	962.305	-0.482941	-1.39759	0.141847	-3.40466	0.000662468	0.0571823	1.24274	3.17883
Hist1h2bq	29902.4	-0.634355	-1.55224	0.186583	-3.39985	0.000674233	0.0571823	1.24274	3.17119
Ccdc92	527.651	-0.766837	-1.70153	0.225639	-3.39851	0.00067755	0.0571823	1.24274	3.16906
Kctd12	11173.7	-0.774146	-1.71018	0.226679	-3.41517	0.000637423	0.0571823	1.24274	3.19557
Reep2	2621.14	-0.812241	-1.75594	0.238351	-3.40776	0.000654995	0.0571823	1.24274	3.18376
Rsph6a	21.3749	-1.04759	-2.06708	0.307984	-3.40146	0.000670262	0.0571823	1.24274	3.17376
Hsp90aa1	3527.84	0.276569	1.21131	0.0815492	3.39143	0.000695285	0.0578467	1.23772	3.15784
Ube2b	4961.12	0.240099	1.18107	0.0707925	3.39159	0.000694892	0.0578467	1.23772	3.15808
Pou2f2	1388.38	-0.307398	-1.23747	0.090869	-3.38287	0.000717318	0.0592596	1.22724	3.14429
Jun	4518.88	0.753839	1.68627	0.2233	3.3759	0.000735746	0.0602273	1.22021	3.13327
Bgn	6090.18	-0.727405	-1.65566	0.215555	-3.37457	0.000739301	0.0602273	1.22021	3.13118
Pea15	668.008	-0.356241	-1.28009	0.10607	-3.35854	0.000783563	0.0629588	1.20094	3.10593
Fhl1	4489.83	-0.628697	-1.54617	0.187161	-3.35912	0.000781919	0.0629588	1.20094	3.10684
Msmo1	355.643	-0.562173	-1.47649	0.168578	-3.3348	0.000853605	0.06812	1.16673	3.06874
Cacng3	57.1874	1.1694	2.24918	0.353171	3.31115	0.000929137	0.0690917	1.16057	3.03192
Pde4d	5339.55	0.564407	1.47878	0.170401	3.31222	0.000925578	0.0690917	1.16057	3.03359
Armcx5	476.626	0.374702	1.29657	0.113178	3.31072	0.000930567	0.0690917	1.16057	3.03125
Slc7a6os	435.3	0.348977	1.27366	0.105277	3.31486	0.00091689	0.0690917	1.16057	3.03768
Spty2d1	1996.31	0.272392	1.20781	0.0819257	3.32486	0.000884616	0.0690917	1.16057	3.05325
Trim11	1007.03	-0.309592	-1.23936	0.0933713	-3.31571	0.000914116	0.0690917	1.16057	3.039
Tor4a	2020.04	-0.411685	-1.33024	0.123791	-3.32564	0.00088215	0.0690917	1.16057	3.05446
G4	293.419	-0.545047	-1.45907	0.164112	-3.32119	0.000896345	0.0690917	1.16057	3.04753
Slc25a13	507.078	-0.588221	-1.50339	0.17759	-3.31223	0.000925542	0.0690917	1.16057	3.0336
Tgfb2	118.895	-0.605518	-1.52153	0.182577	-3.31651	0.00091149	0.0690917	1.16057	3.04025
Apex2l1	60.5755	-0.899417	-1.86531	0.270761	-3.32181	0.000894368	0.0690917	1.16057	3.04848
Ifitm10	17.7723	-1.25751	-2.39082	0.379949	-3.30968	0.000934034	0.0690917	1.16057	3.02964
Mid1	203.575	-0.804933	-1.74706	0.243812	-3.30145	0.000961859	0.0709658	1.14895	3.01689
Plcd1	184.402	-0.604121	-1.52005	0.18315	-3.29851	0.000971997	0.0712656	1.14712	3.01234
Zfp455	411.378	-0.325646	-1.25323	0.0989459	-3.29116	0.000997766	0.0727005	1.13846	3.00097
Rb1	8745.49	-0.521222	-1.43517	0.158552	-3.2874	0.00101119	0.0732236	1.13535	2.99517
Cd84	3369.69	-0.506436	-1.42054	0.154142	-3.28551	0.00101797	0.0732623	1.13512	2.99227
Gpr18	521.202	-0.663084	-1.58346	0.20216	-3.28	0.00103808	0.0742545	1.12928	2.98377
Lrch2	3.29385	-2.91843	-7.56025	0.889851	-3.27969	0.00103922	0.0742545	1.12928	2.98329
Ppp1r15a	492.052	0.923026	1.89609	0.282184	3.27101	0.00107163	0.0755978	1.12149	2.96995
Ankrd42	343.593	0.383737	1.30472	0.117563	3.26411	0.00109808	0.0755978	1.12149	2.95937
Taf7	2140.85	0.377126	1.29875	0.115573	3.26311	0.00110197	0.0755978	1.12149	2.95783
Tra2b	4895.53	0.317034	1.24577	0.0969894	3.26875	0.00108023	0.0755978	1.12149	2.96648
Rnf11l1	11671.4	-0.551634	-1.46575	0.168928	-3.26551	0.00109268	0.0755978	1.12149	2.96151
F5	60059	-0.640778	-1.55917	0.195802	-3.27258	0.00106569	0.0755978	1.12149	2.97237
Astn1	1259	-0.756707	-1.68963	0.231649	-3.26661	0.00108845	0.0755978	1.12149	2.96319
Hps1	2505.39	-0.198791	-1.14774	0.061069	-3.25519	0.00113317	0.0772863	1.1119	2.9457
Fam78b	344.918	-0.427109	-1.34454	0.131476	-3.24856	0.00115991	0.0786525	1.10429	2.93558
Rell1	948.413	0.321005	1.2492	0.0989254	3.24492	0.00117482	0.079206	1.10124	2.93003
Mt-nd4l	4512.8	0.789494	1.72847	0.243579	3.24122	0.00119021	0.0794215	1.10006	2.92438
Zfp467	590.101	-0.325015	-1.25268	0.100336	-3.23928	0.00119833	0.0794215	1.10006	2.92142
Nfe2	6948.78	-0.794634	-1.73464	0.245294	-3.23952	0.0011973	0.0794215	1.10006	2.9218
Odad3	2.03473	3.79274	13.8589	1.17254	3.23463	0.00121802	0.0806277	1.09352	2.91434
Tagap	9865.07	0.358334	1.28194	0.110876	3.23184	0.00122997	0.0806277	1.09352	2.9101
Rasgrp3	6418.86	-0.606632	-1.5227	0.187709	-3.23177	0.00123027	0.0806277	1.09352	2.91
Ypel5	17327.3	-0.661768	-1.58202	0.205021	-3.22781	0.00124742	0.0812971	1.08992	2.90399
Zc3h14	2025.99	0.22213	1.16645	0.0691099	3.21416	0.00130829	0.0847928	1.07164	2.8833
Stard5	128.105	-0.58389	-1.49889	0.181824	-3.21129	0.00132141	0.0851732	1.0697	2.87896
Ap3s1	1839.21	-0.393306	-1.3134	0.122924	-3.19958	0.00137628	0.0882251	1.05441	2.86129
Tax1bp1	91047.2	-0.615	-1.53156	0.192314	-3.19789	0.00138436	0.0882606	1.05423	2.85875
Srrd	252.001	0.365175	1.28804	0.114523	3.18865	0.0014294	0.0891572	1.04984	2.84485
Ythdc1	3594.66	0.272657	1.20803	0.0857502	3.17967	0.00147443	0.0891572	1.04984	2.83138
Gtf3c1	4016.08	0.241545	1.18226	0.0758336	3.18519	0.00144658	0.0891572	1.04984	2.83966
Srsf3	8643.42	0.19043	1.1411	0.0597562	3.18678	0.00143867	0.0891572	1.04984	2.84204
Gse1	4967.68	-0.232419	-1.1748	0.0730359	-3.18226	0.00146133	0.0891572	1.04984	2.83525
Dstyk	783.08	-0.264784	-1.20146	0.0831735	-3.18351	0.001455	0.0891572	1.04984	2.83714
Fcer2	1893.6	-0.305542	-1.23588	0.0959066	-3.18583	0.00144337	0.0891572	1.04984	2.84062
Dcp2	946.357	-0.361546	-1.2848	0.113442	-3.18706	0.00143727	0.0891572	1.04984	2.84246
Lpin2	3192.54	-0.406851	-1.32579	0.127794	-3.18365	0.00145431	0.0891572	1.04984	2.83734
Acer2	1943.87	-0.591395	-1.5067	0.18591	-3.18108	0.00146726	0.0891572	1.04984	2.83349
Palmd	65.0088	-0.901352	-1.86782	0.284163	-3.17195	0.00151419	0.091092	1.04052	2.81982
RGD1564865	17.6202	-1.2075	-2.30937	0.380663	-3.1721	0.00151342	0.091092	1.04052	2.82004
Zfp346	434.382	-0.296952	-1.22855	0.0936817	-3.1698	0.00152543	0.0912998	1.03953	2.81661
Dusp5	1397.91	0.80667	1.74917	0.254624	3.16808	0.00153449	0.0913441	1.03932	2.81403
Crem	1153.1	0.521735	1.43568	0.164852	3.16487	0.00155151	0.0913441	1.03932	2.80925
AABR07008066.2	210.461	0.407904	1.32676	0.129106	3.15945	0.00158067	0.0913441	1.03932	2.80116
Dnajb6	4031.82	0.195957	1.14548	0.0619672	3.16226	0.00156547	0.0913441	1.03932	2.80535
Cltc	13047.1	-0.244437	-1.18463	0.0772955	-3.16238	0.00156487	0.0913441	1.03932	2.80552
Scarf1	145.071	-0.664974	-1.58554	0.210334	-3.16152	0.00156948	0.0913441	1.03932	2.80425
Gp1bb	8500.65	-0.767841	-1.70272	0.242988	-3.15999	0.00157773	0.0913441	1.03932	2.80197
Slc35g1	4.3954	-2.41899	-5.34795	0.766809	-3.15462	0.0016071	0.0913441	1.03932	2.79396
Tstd3	417.188	-0.34231	-1.26779	0.108777	-3.1469	0.00165009	0.0948885	1.02279	2.78249
Ddx5	35884.2	0.182151	1.13457	0.0579688	3.14223	0.00167668	0.0959468	1.01797	2.77555
Rap1gap2	2173.83	-0.410011	-1.3287	0.130669	-3.13778	0.00170235	0.0961445	1.01708	2.76895
Rnf152	590.883	-0.492699	-1.40707	0.15698	-3.13861	0.00169753	0.0961445	1.01708	2.77018
Fbxw8	103.459	-0.496267	-1.41056	0.158179	-3.13737	0.00170472	0.0961445	1.01708	2.76835
Cd34	3.71414	-3.09955	-8.57149	0.988863	-3.13445	0.00172175	0.0961445	1.01708	2.76403
Kbtbd2	3665.34	0.345001	1.27015	0.110204	3.13055	0.00174477	0.0976322	1.01041	2.75826
Keap1	1105.55	-0.297152	-1.22872	0.0949352	-3.13005	0.00174774	0.0976322	1.01041	2.75752
Mex3a	119.337	0.554291	1.46845	0.177294	3.1264	0.00176959	0.0979514	1.00899	2.75213
Anapc16	574.721	-0.215753	-1.16131	0.0690119	-3.12631	0.00177016	0.0979514	1.00899	2.75199
Egln3	521.478	0.65235	1.57173	0.208975	3.12166	0.00179835	0.0990445	1.00417	2.74513
Ing3	1568.57	0.292794	1.22501	0.0940455	3.11332	0.00184992	0.0997581	1.00105	2.73285
Matr3	7187.1	0.212298	1.15853	0.0681906	3.1133	0.00185005	0.0997581	1.00105	2.73282
Calhm2	487.424	-0.527079	-1.44101	0.169221	-3.11474	0.00184109	0.0997581	1.00105	2.73492
Arhgap6	1417.95	-0.562636	-1.47697	0.180755	-3.1127	0.00185383	0.0997581	1.00105	2.73193
Morc4	1877.22	-0.751326	-1.68334	0.241359	-3.1129	0.00185256	0.0997581	1.00105	2.73223
